# Supplementary material
Source: publisher site journal article supplement (https://www.dovepress.com/article/227862)
Supplement: Supplementary file 1 [file get_supplementary_file.php]

**Supporting materials**

**Pharmacological Evaluation**

**Antiproliferative Activity**

A549,[1](#_ENREF_1) HT-29,[2](#_ENREF_2) and ZR-75[3](#_ENREF_3) cells were harvested from 90-95% confluent 10 cm dishes, and diluted in growth media. Appropriate concentrations of cells were prepared by adding 1,250 cells in a volume of 25 µL per well in tissue culture treated Griener 384-well microplates, then incubated overnight at 37 °C. The investigational compounds **5a–s** were diluted to a concentration of 30 µM in DMSO. Concentrated dosing solutions of twice the final concentration were prepared by dilution of the DMSO stocks 1:500 in growth media. Two-fold serial dilutions were then prepared in a medium containing 0.2% DMSO to maintain a constant concentration of vehicle throughout the concentration range of the compound. Each of these solutions was added, in equal volume (25 µL), to four wells on each cell assay plate, along with vehicle control. Top concentration and serial dilution of the positive control compound, sunitinib, was prepared exactly as the experimental compounds. Cells were incubated with the compounds for a further 72 h. At the end of the treatment period, assay plates were allowed to cool to room temperature for 10 min prior to addition of 25 µL per well Promega CellTiterGlo reagent, followed by additional 10 min incubation at room temperature. The resulting luminescence was quantitated using a Molecular Devices Spectramax Paradigm (Sunnyvale, CA, USA). Percent growth inhibition was calculated as follows, where 100 represents the viability of vehicle treated control samples:

100 - (100 x (sample)

(vehicle control)

Thus, on average, growth inhibition of vehicle control samples equals zero. Potency of compounds was determined using the Non Linear Dose Response algorithm (4-parameter logistic fit) with Graph Pad Prism 5 software package (San Diego, CA, USA).

**Cell Cycle Effects**

A549 cells were harvested from a 90% confluent 10 cm dish, and diluted in growth media. Appropriate concentrations of cells were prepared by adding 5,000 cells in a volume of 100 µL per well in tissue culture treated Perkin Elmer ViewPlateTM microplates (Perkin Elmer, CT, USA), then incubated overnight at 37 °C. The following day, experimental compound **5m** and the control compound, sunitinib, were diluted in DMSO to concentrations 1000-fold above the maximum tested concentration. Concentrated dosing solutions of twice the final concentration were prepared by dilution of the DMSO stocks 1:500 in growth media. Three-fold dilutions of each dosing medium were then prepared in medium containing 0.2% DMSO to maintain a constant concentration of vehicle throughout the concentration range of each compound. Each of these solutions was added in equal volume (100 µL), to each well on the assay plate, along with vehicle control. One plate of cells was incubated with the compounds for a further 24h, and a separate plate was incubated with the compounds for 48 h. At the end of the respective treatment periods, 150 µL per well of neutral buffered formalin fixative (10% paraformaldehyde) was rapidly added to each plate and incubated at room temperature for 20 min. Fixative was removed by washing thrice with phosphate buffered saline (PBS). Cell membranes were permeabilized and non-specific binding sites were blocked by incubation with 0.3% Triton X-100 and 5% FBS in PBS for 1 h. Phosphorylated Rb protein (P-Rb) was detected by 1 h incubation with anti-P-Rb rabbit monoclonal antibody (Cell Signaling no. 8516) diluted 1:1600 in antibody dilution buffer (1% bovine serum albumin and 0.3% Triton X-100 in PBS). Unbound antibody was removed by washing thrice with PBS. Anti-P-Rb antibody was detected by 1 h incubation with goat anti-rabbit AlexaFluor 488 conjugate (InVitrogen) diluted 1:500 in antibody dilution buffer. The secondary antibody solution was supplemented with 1 µg/mL DAPI to quantitate double stranded DNA within each cell nucleus.

Unbound antibody was removed by washing thrice with PBS. Nine fields per well were immediately imaged in a Molecular Devices ImageXpress® MicroXL automated fluorescent microscope system (Molecular Devices, Sunnyvale, CA, USA) using a 10x magnification objective lens. DAPI and FITC filter cubes, respectively, were used to visualize nuclei and immunolabeled P-Rb residues. Identical autofocus and exposure parameters were used for every sample. Fluorescent micrographs were analyzed using Molecular Devices MetaXpress multi-wavelength cell scoring image analysis program to quantitate Rb phosphorylation. The mean nuclear average intensity of P-Rb staining (RFU) per cell was reported and has been graphed using GraphPad Prism statistical and graphing software. Where appropriate, an IC50 value has been reported to reflect potency of the compound effect on P-Rb. DNA content in each cell was determined by total DAPI stain intensity and assigned to the appropriate category using the MetaXpress cell cycle analysis program. Results from each treatment were reported as average cell number in each of nine fields, as well as the percentage of cells within each phase of the cell cycle. Each of these parameters was analyzed using GraphPad Prism, and, where appropriate, IC50 values have been reported.

**IC50 calculations**

The Hill 4-parameter logistic equation was used to determine IC50 values as previously described.[4](#_ENREF_4) GraphPad Prism software employed nonlinear regression analysis to fit the experimental data (response versus log of the tested concentration) to the Hill 4-parameter dose response curve defined by the minimum and maximum responses, Hill slope, and logIC50 values (which are mathematically converted to IC50 values by the software).

**Selectivity**

A-549, IEC-6, MCF-10A and 3t3 cells were harvested from 90-95% confluent cultures in 10 cm dishes, and diluted in growth media recommended by the suppliers as follows: A-549 cells were cultured in RPMI-1640 medium supplemented with 5% fetal bovine serum (FBS). IEC-6 cells were cultured in Dulbecco’s modification of Eagle’s medium (DMEM) supplemented with 10% FBS and 0.1 unit/mL recombinant insulin. Swiss 3t3 cells were cultured in DMEM supplemented with 10% FBS. MCF-10A cells were cultured in a mixture DMEM and F12 media supplemented with 5% fetal bovine serum (FBS), 20 ng/mL recombinant epidermal growth factor, 10 µg/mL insulin, 0.5 µg/mL hydrocortisone, and 100 ng/mL cholera toxin. Appropriate concentrations of cells were prepared by adding 1,250 cells in a volume of 25 µL per well in tissue culture treated BD 384-well microplates, then incubated overnight at 37 °C.

Experimental compound **5m** and control, sunitinib, were diluted to a concentration of 25 mM in DMSO. Concentrated dosing solutions of twice the final concentration were prepared by dilution of the DMSO stocks 1:500 in growth media. Two-fold serial dilutions were then prepared in medium containing 0.2% DMSO to maintain a constant concentration of vehicle throughout the concentration range of the test compound. Each of these solutions was added, in equal volume (25 µL), to four wells on each cell assay plate, along with vehicle control. Top concentration and serial dilution of the positive control compound, sunitinib, was prepared exactly as the experimental compounds. Cells were incubated at 37 °C with the compounds for a further 72 h. At the end of the treatment period, assay plates were allowed to cool to room temperature for 10 min prior to addition of 25 µL per well Promega CellTiterGlo reagent, followed by an additional 10 min incubation at room temperature. The resulting luminescence was quantitated using a Molecular Devices Spectramax Paradigm.Percent growth inhibition was calculated as previously mentioned in the antiproliferative activitysection. Potency of compounds was determined using the Non Linear Dose Response algorithm (4-parameter logistic fit) with GraphPad Prism 5 software.

**Multidrug Resistant Lung Cancer Cell Line**

A549 and H69AR cells were harvested from 90-95% confluent 10 cm dishes, and diluted in growth media. Appropriate concentrations of cells were prepared by adding 1,250 cells in a volume of 25 µL per well in tissue culture treated BD 384-well microplates, then incubated overnight at 37 °C. Experimental compound **5m** and the positive control, sunitinib, were diluted to a concentration of 25 mM in DMSO. Concentrated dosing solutions of twice the final concentration were prepared by dilution of the DMSO stocks 1:500 in growth media. Two-fold serial dilutions were then prepared in medium containing 0.2% DMSO to maintain a constant concentration of vehicle throughout the concentration range of the compound. Each of these solutions was added, in equal volume (25 µL), to four wells on each cell assay plate, along with vehicle control. Top concentration and serial dilution of the positive control compound, sunitinib, was prepared exactly as the experimental compound **5m**. Cells were incubated at 37 °C with the compound **5m** for a further 72 h. At the end of the treatment period, assay plates were allowed to cool to room temperature for 10 min prior to addition of 25 µL per well Promega CellTiterGlo reagent, followed by an additional 10 min incubation at room temperature. The resulting luminescence was quantitated using a Molecular Devices Spectramax Paradigm. Percent growth inhibition was calculated as previously mentioned in the antiproliferative activitysection. Potency of compounds was determined using the Non Linear Dose Response algorithm (4-parameter logistic fit) with GraphPad Prism 5 software.

Western blot figures of compound **5m**.


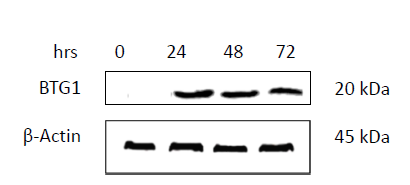


**Figure S1** Compound **5m** increases the expression of BTG1 in A-549 cell line at 24, 48, and 72 h.


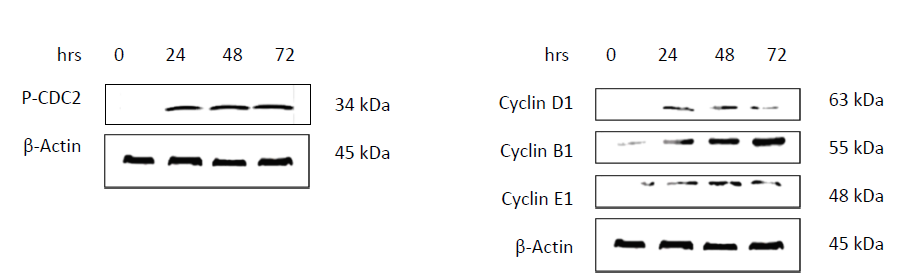


**Figure S2** Cyclin-associated proteins expressions levels western blot before and after treatment with **5m**. Phosphorylated cyclin-dependent kinase 1 (left), cyclin D1, B1, and E1 (right).

**Figure S3** Western blot analysis showing Bcl-2 and BAX expression levels (left) and cleaved caspase-3 (right) at 24, 48, and 72 after **5m** treatment in A-549 cell line.

**Cell viability assay using HEK 293 cell line**

To determine the effect of compound **5m** on cell viability, human embryonic kidney (HEK) 293 cells were seeded in 96-well plates at a density of 1 × 104 cells/well and incubated for 24 hours in 100 μL media/well. Serial dilutions of **5m** with the highest concentration being 20 µM and then 10 serial dilutions were added to cells. At predetermined time points, 20 μL of 2.5 mg/mL of 3-(4,5-dimethylthiazol-2-yl)-2,5-diphenyltetrazolium bromide (MTT) in PBS were added to the cells and cell were further incubated at 37 °C. After 4 hours, MTT solutions were completely removed and 100 μL DMSO were added to solubilize formazan crystals. Absorbance was measured at 540 nm using Spectramax 250 microplate reader (Molecular device, CA, USA) and percent viability was calculated.

**Table S1** The in-silicoADME parameters of the target compounds **5a–s**.

| Compound No.  Parameter | **5a** | **5b** | **5c** | **5d** | **5e** | **5f** | **5g** | **5h** | **5i** | **5j** | **5k** | **5l** | **5m** | **5n** | **5o** | **5p** | **5q** | **5r** | **5s** |
| --- | --- | --- | --- | --- | --- | --- | --- | --- | --- | --- | --- | --- | --- | --- | --- | --- | --- | --- | --- |
| Mol. Wt. | 304.3 | 383.2 | 338.8 | 322.3 | 334.3 | 318.3 | 397.2 | 352.8 | 336.3 | 348.4 | 394.4 | 473.2 | 428.9 | 412.4 | 424.4 | 428.9 | 419.3 | 408.5 | 380.4 |
| HD | 3 | 3 | 3 | 3 | 3 | 2 | 2 | 2 | 2 | 2 | 2 | 2 | 2 | 2 | 2 | 2 | 2 | 2 | 2 |
| HA | 3 | 3 | 3 | 4 | 4 | 3 | 3 | 3 | 4 | 4 | 3 | 3 | 3 | 4 | 4 | 3 | 4 | 3 | 3 |
| Rotatable bonds | 3 | 3 | 3 | 3 | 4 | 3 | 3 | 3 | 3 | 4 | 5 | 5 | 5 | 5 | 6 | 5 | 5 | 5 | 4 |
| Log *P* | 2.3 | 2.8 | 2.7 | 2.5 | 2.2 | 2.5 | 3.0 | 2.9 | 2.7 | 2.4 | 3.4 | 4.2 | 4.2 | 3.9 | 3.6 | 4.0 | 3.2 | 3.8 | 3.7 |
| Log *S* | -4.7 | -5.4 | -5.3 | -4.8 | -4.8 | -4.7 | -5.4 | -5.3 | -4.8 | -4.8 | -6.2 | -6.9 | -6.9 | -6.3 | -6.4 | -6.9 | -6.4 | -6.6 | -6.3 |
| HIA (%) | 89.3 | 91.9 | 91.1 | 89.4 | 89.1 | 91.9 | 93.4 | 92.9 | 91.9 | 91.9 | 93.7 | 94.4 | 94.2 | 93.7 | 93.9 | 94.2 | 94.1 | 93.8 | 93.5 |
| Molar refractivity | 89.8 | 97.5 | 94.8 | 89.8 | 96.3 | 94.7 | 102.4 | 99.7 | 94.7 | 101.2 | 119.2 | 126.9 | 124.2 | 119.1 | 125.7 | 124.2 | 123.9 | 124.2 | 114.9 |
| TPSA ( Å²) | 86.4 | 86.4 | 86.4 | 86.4 | 95.6 | 77.6 | 77.6 | 77.6 | 77.6 | 86.8 | 77.6 | 77.6 | 77.6 | 77.6 | 86.8 | 77.6 | 101.4 | 77.6 | 77.6 |
| Caco-2 (nm/sec) | 12.3 | 18.9 | 19.3 | 18.8 | 17.3 | 12.5 | 19.7 | 20.0 | 19.8 | 18.9 | 12.8 | 22.0 | 21.9 | 21.1 | 21.1 | 21.9 | 10.0 | 14.3 | 8.5 |
| Bioavailability Score | 0.6 | 0.6 | 0.6 | 0.6 | 0.6 | 0.6 | 0.6 | 0.6 | 0.6 | 0.6 | 0.6 | 0.6 | 0.6 | 0.6 | 0.6 | 0.6 | 0.6 | 0.6 | 0.6 |
| Blood brain barrier | 0.6 | 1.1 | 1.0 | 0.7 | 0.3 | 0.6 | 1.3 | 1.2 | 0.8 | 0.3 | 1.5 | 2.8 | 2.7 | 1.9 | 0.8 | 2.7 | 0.5 | 2.3 | 1.8 |
| Plasma protein binding | 93.5 | 98.7 | 98.3 | 93.1 | 91.9 | 96.7 | 100 | 100 | 96.6 | 94.9 | 99.7 | 97.4 | 98.8 | 95.8 | 98.2 | 95.2 | 100 | 98.2 | 95.3 |
| Skin permeability | -4.5 | -4.5 | -4.6 | -4.7 | -4.6 | -4.4 | -4.3 | -4.4 | -4.6 | -4.5 | -3.6 | -3.5 | -3.6 | -3.9 | -3.7 | -3.6 | -3.5 | -3.5 | -3.7 |
| P-gp inhibition | - ve | - ve | - ve | - ve | - ve | - ve | - ve | - ve | - ve | - ve | + ve | + ve | + ve | + ve | + ve | + ve | + ve | + ve | + ve |
| CYP-2C19-inhibition | - ve | - ve | - ve | - ve | - ve | - ve | + ve | + ve | - ve | - ve | + ve | + ve | + ve | + ve | + ve | + ve | + ve | + ve | + ve |
| CYP-2C9-inhibition | - ve | + ve | + ve | - ve | + ve | + ve | + ve | + ve | + ve | + ve | + ve | + ve | + ve | + ve | + ve | + ve | + ve | + ve | + ve |
| CYP-2D6-inhibition | + ve | + ve | + ve | + ve | + ve | + ve | - ve | - ve | - ve | - ve | - ve | - ve | - ve | - ve | - ve | - ve | - ve | - ve | - ve |
| CYP-3A4-inhibition | + ve | + ve | + ve | + ve | + ve | + ve | + ve | + ve | + ve | + ve | + ve | + ve | + ve | - ve | + ve | + ve | + ve | + ve | - ve |
| CYP-1A2-inhibition | + ve | + ve | + ve | + ve | + ve | + ve | + ve | + ve | + ve | + ve | + ve | + ve | + ve | + ve | + ve | + ve | + ve | + ve | + ve |

Mol. Wt.: molecular weight; HD: hydrogen bond donor; HA: hydrogen bond acceptor; log *P*: octanol/water partition coefficient; log *S* aqueous solubility; HIA: human intestinal absorption;TPSA: topological polar surface area; Caco-2 cells: a well-differentiated intestinal cell line derived from human colorectal carcinoma; P-gp: P-glycoprotein; CYP: cytochrome P450; - ve: negative; + ve: positive.

**References**

1. Hao F, Wang S, Zhu X, et al. Pharmacokinetic-pharmacodynamic modeling of the anti-tumor effect of sunitinib combined with dopamine in the human non-small cell lung cancer xenograft. *Pharm Res.* 2017; 34(2):408–418.
2. Potapova O, Laird AD, Nannini MA, et al. Contribution of individual targets to the antitumor efficacy of the multitargeted receptor tyrosine kinase inhibitor SU11248. *Mol Cancer Ther*.2006; 5(5):1280–1289.
3. Spanheimer PM, Lorenzen AW, De Andrade JP, et al. Receptor tyrosine kinase expression predicts response to sunitinib in breast cancer. *Ann Surg Oncol.* 2015; 22(13): 4287–4294.
4. Gesztelyi R, Zsuga J, Kemeny-Beke A, et al. The Hill equation and the origin of quantitative pharmacology. *Arch Hist Exact Sci.* 2012; 66(4):427–438.
